# Supplementary material
Source: PubMed Central journal article supplement (PMC8029475)
Supplement: BPA-25-266-s001.pdf [file BPA-25-266-s001.pdf]

Supplementary material 4

**MITOTIC INDEX IS AN INDEPENDENT PREDICTOR OF  
RECURRENCE-FREE SURVIVAL IN MENINGIOMA**

Brain Pathology

**Authors:**

Adriana Olar, Khalida M Wani, Erik P Sulman, Alireza Mansouri, Gelareh Zadeh, Charmaine D Wilson, Franco DeMonte, Gregory N Fuller, Kenneth D Aldape

**Corresponding authors:**

Adriana Olar, MD  
The University of Texas MD Anderson Cancer Center  
Dept. of Pathology, G1.3510  
1515 Holcombe Blvd.  
Houston, TX, 77030, USA  
Phone: 713-745-0935  
Fax: 713-745-0789  
Email: [adriana\\_olar@yahoo.com](mailto:adriana_olar@yahoo.com)

Kenneth Aldape, MD  
Princess Margaret Cancer Centre and Ontario Cancer Institute  
610 University Ave  
Toronto, ON M5G 2M9, Canada  
Email: [kaldape@uhnresearch.ca](mailto:kaldape@uhnresearch.ca)

## Mitotic index - multivariate analysis

**Table S4.1:** Multivariate analysis – these 5 variables were computed together. Mitotic index denotes raw values (computed as a continuous variable).

| <b>Variable</b> | <b>p-value</b>  | <b>Hazard ratio</b> | <b>95% CI</b> |
|-----------------|-----------------|---------------------|---------------|
| Age             | 0.110           | 0.98                | 0.97-1.00     |
| WHO grade       | <b>0.018</b>    | 1.82                | 1.10-3.00     |
| MIB-1 index     | 0.564           | 0.98                | 0.95-1.02     |
| Mitotic index   | <b>0.022</b>    | 1.08                | 1.01-1.15     |
| Simpson grade   | <b>&lt;0.01</b> | 1.72                | 1.45-2.03     |
