# Supplementary material
Source: PubMed Central journal article supplement (PMC8029475)
Supplement: BPA-25-266-s002.pdf [file BPA-25-266-s002.pdf]

Supplementary material 5

**MITOTIC INDEX IS AN INDEPENDENT PREDICTOR OF  
RECURRENCE-FREE SURVIVAL IN MENINGIOMA**

Brain Pathology

**Authors:**

Adriana Olar, Khalida M Wani, Erik P Sulman, Alireza Mansouri, Gelareh Zadeh, Charmaine D Wilson, Franco DeMonte, Gregory N Fuller, Kenneth D Aldape

**Corresponding authors:**

Adriana Olar, MD  
The University of Texas MD Anderson Cancer Center  
Dept. of Pathology, G1.3510  
1515 Holcombe Blvd.  
Houston, TX, 77030, USA  
Phone: 713-745-0935  
Fax: 713-745-0789  
Email: [adriana\\_olar@yahoo.com](mailto:adriana_olar@yahoo.com)

Kenneth Aldape, MD  
Princess Margaret Cancer Centre and Ontario Cancer Institute  
610 University Ave  
Toronto, ON M5G 2M9, Canada  
Email: [kaldape@uhnresearch.ca](mailto:kaldape@uhnresearch.ca)

**Table S5.1:** The median Ki-67 index among all WHO meningioma grades.

| WHO grade  | Median Ki-67 index (range) |
|------------|----------------------------|
| <b>I</b>   | 2.95 (0-23)                |
| <b>II</b>  | 9.4 (1.2-36.4)             |
| <b>III</b> | 33.5 (12.4-88.7)           |

MIB-1 cutoffs were calculated using the PERCENTRANK function (Excel for Mac v. 2011). The following significant cutoffs/subgroups were identified: 0-2.5%, 2.6-6.6%, and >6.7%.

On univariate analysis (Cox proportional hazard) these MIB-1 subgroups were predictive of RFS ( $p < 0.01$ , HR=1.93, 95%CI=1.52-2.46). Kaplan-Meier survival curves are represented in **Figure S5.1**.

On multivariate analysis MIB-1 subgroups and Simpson grade were predictive of RFS, while the WHO grade and the mitotic index were not (**Table S5.2**). However, when mitotic index subgroups replaced mitotic index in multivariate analysis, (Table S5.3) it became strongly associated with RFS while MIB-1 subgroups did not.

**Table S5.2:** Multivariate analysis including mitotic index as a continuous variable in the model.

| Variable             | p-value         | Hazard Ratio | 95% CI    |
|----------------------|-----------------|--------------|-----------|
| <b>WHO</b>           | 0.1640          | 1.40         | 0.87-2.27 |
| <b>MIB subgroups</b> | <b>0.0319</b>   | 1.38         | 1.02-1.87 |
| <b>Mitotic index</b> | 0.0890          | 1.05         | 0.99-1.11 |
| <b>Simpson grade</b> | <b>&lt;0.01</b> | 1.69         | 1.43-1.99 |

**Table S5.3:** Multivariate analysis including mitotic index subgroups (0-2, 3-4,  $\geq 5$ ) in the model.

| Variable                       | p-value         | Hazard Ratio | 95% CI    |
|--------------------------------|-----------------|--------------|-----------|
| <b>WHO</b>                     | 0.3883          | 1.23         | 0.76-1.99 |
| <b>MIB subgroups</b>           | 0.1146          | 1.28         | 0.94-1.75 |
| <b>Mitotic index subgroups</b> | <b>0.0074</b>   | 1.57         | 1.12-2.19 |
| <b>Simpson grade</b>           | <b>&lt;0.01</b> | 1.69         | 1.43-2.00 |

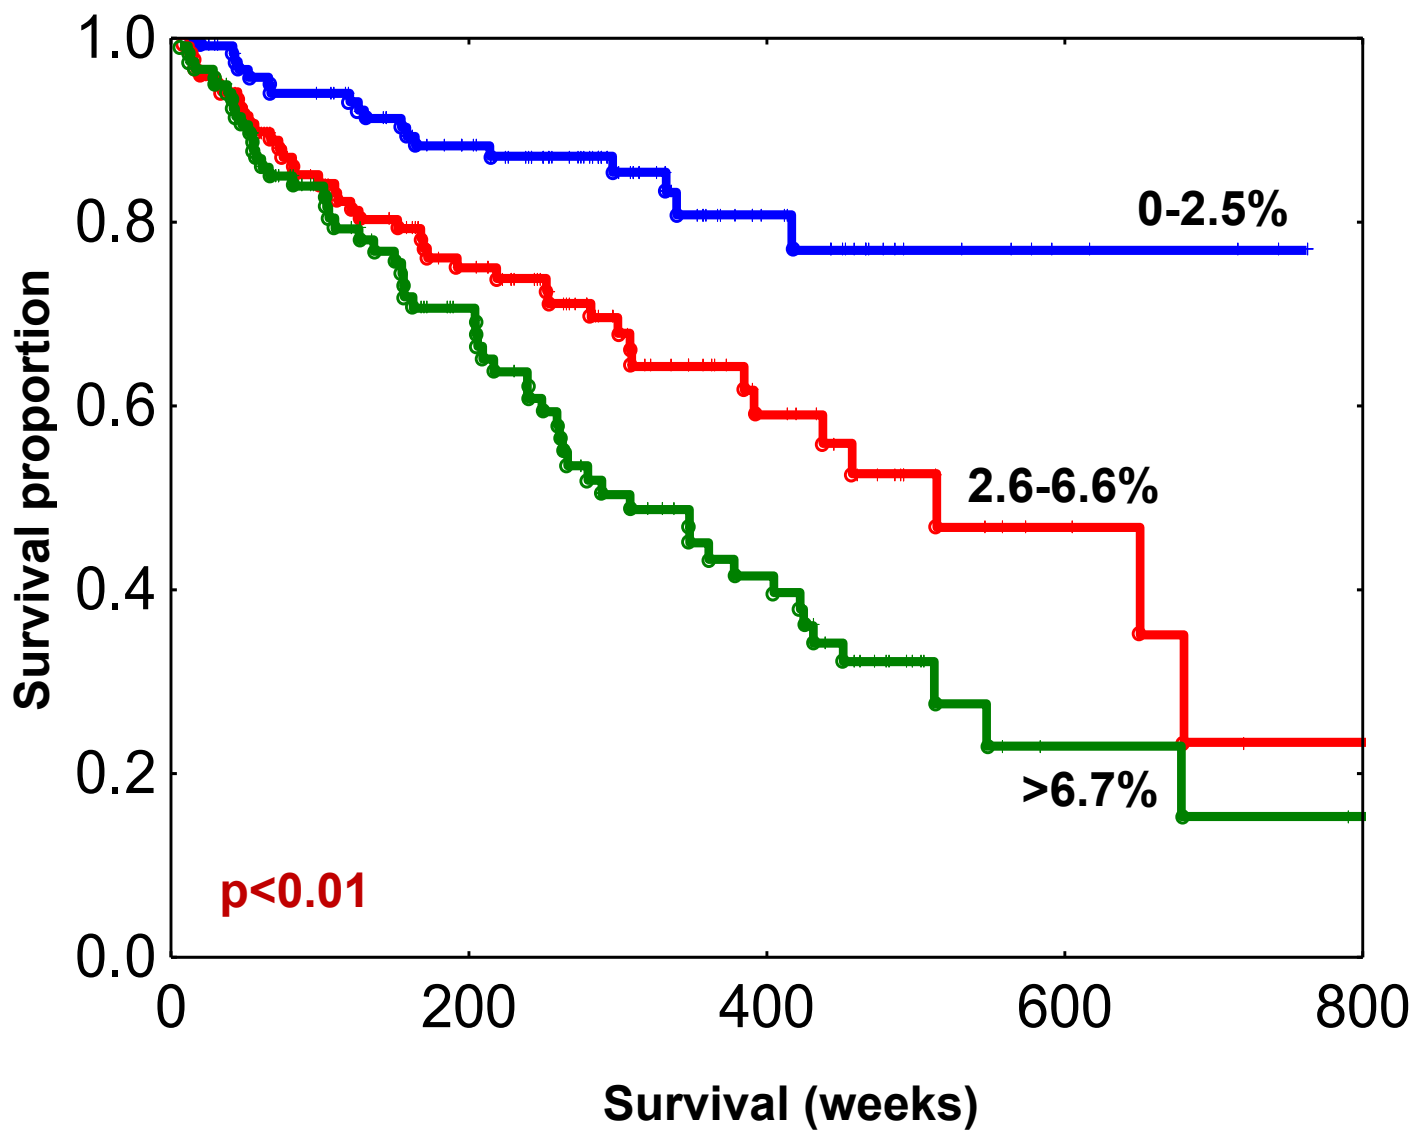

**Figure S5.1:** MIB-1 subgroups separates risk-groups among all WHO grade meningiomas (Kaplan-Meier survival curve).
