# Supplementary material
Source: PubMed Central journal article supplement (PMC8029475)
Supplement: BPA-25-266-s004.pdf [file BPA-25-266-s004.pdf]

Supplementary material 1

**MITOTIC INDEX IS AN INDEPENDENT PREDICTOR OF  
RECURRENCE-FREE SURVIVAL IN MENINGIOMA**

Brain Pathology

**Authors:**

Adriana Olar, Khalida M Wani, Erik P Sulman, Alireza Mansouri, Gelareh Zadeh, Charmaine D Wilson, Franco DeMonte, Gregory N Fuller, Kenneth D Aldape

**Corresponding authors:**

Adriana Olar, MD  
The University of Texas MD Anderson Cancer Center  
Dept. of Pathology, G1.3510  
1515 Holcombe Blvd.  
Houston, TX, 77030, USA  
Phone: 713-745-0935  
Fax: 713-745-0789  
Email: [adriana\\_olar@yahoo.com](mailto:adriana_olar@yahoo.com)

Kenneth Aldape, MD  
Princess Margaret Cancer Centre and Ontario Cancer Institute  
610 University Ave  
Toronto, ON M5G 2M9, Canada  
Email: [kaldape@uhnresearch.ca](mailto:kaldape@uhnresearch.ca)

**Table:** Simpson grade definitions and the risk of recurrence in meningioma as originally described by Dr. Donald Simpson in 1957 [1].

| <b>Simpson Grade</b> | <b>Completeness of Resection</b>                                                                                                           | <b>Recurrence rate (%)</b> |
|----------------------|--------------------------------------------------------------------------------------------------------------------------------------------|----------------------------|
| <b>I</b>             | Complete removal of tumor with its dural attachments including resection of underlying abnormal bone and/or involved sinus (if applicable) | 9                          |
| <b>II</b>            | Complete removal and coagulation of dural attachment (charring) and tumor extensions                                                       | 19                         |
| <b>III</b>           | Complete removal without resection or coagulation of dural attachments, or without resection of abnormal bone or invaded sinus             | 29                         |
| <b>IV</b>            | Subtotal resection                                                                                                                         | 39                         |

**Reference:**

1. Simpson D (1957) The recurrence of intracranial meningiomas after surgical treatment. Journal of neurology, neurosurgery, and psychiatry 20: 22-39
